# Supplementary material for: Surface pre-sacrifice behavior of thiourea-based 2D perovskites for high-performance perovskite solar cells
Source: Royal Society of Chemistry journal article supplement (doi:10.1039/d3tc03513a), 2023-12-06
Supplement: d3tc03513a1.pdf [file d3tc03513a1.pdf]

## Supplementary Information

### **Surface pre-sacrifice behavior of thiourea-based 2D perovskite for high-performance perovskite solar cells**

Haiying Zheng<sup>a\*</sup>, Xinhe Dong<sup>a</sup>, Chao Wang<sup>a</sup>, Feifan Chen<sup>a</sup>, Guozhen Liu<sup>b\*</sup>

<sup>a</sup>Institutes of Physical Science and Information Technology, Anhui University, Hefei  
230601, P. R. China.

<sup>b</sup>State Key Laboratory of Fine Chemicals, School of Chemistry, Dalian University of  
Technology, Dalian 116024, China

\*Corresponding author: Haiying Zheng, Guozhen Liu

E-mail address: hyzheng@ahu.edu.cn (H. Zheng), orcid.org/0000-0003-4480-9576

gzliu@dlut.edu.cn (G. Liu), orcid.org/0000-0002-7048-5344.

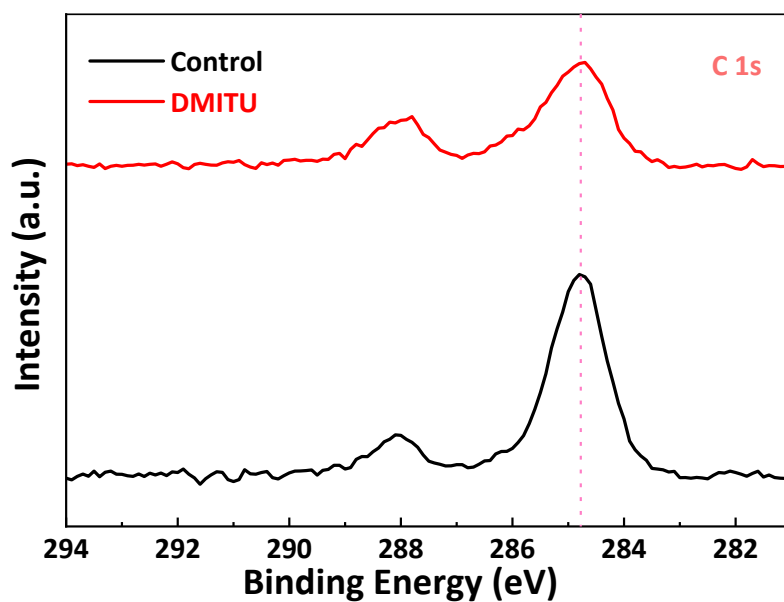

Fig. S1 XPS spectra of C 1s for the control and DMITU perovskite films.

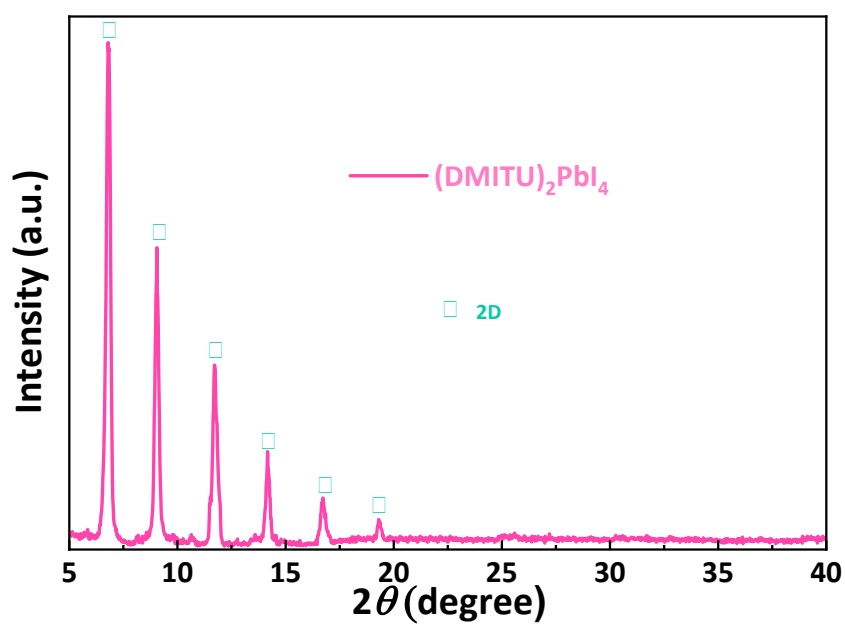

Fig. S2 XRD pattern of (DMITU)<sub>2</sub>PbI<sub>4</sub> (n=1) perovskite film.

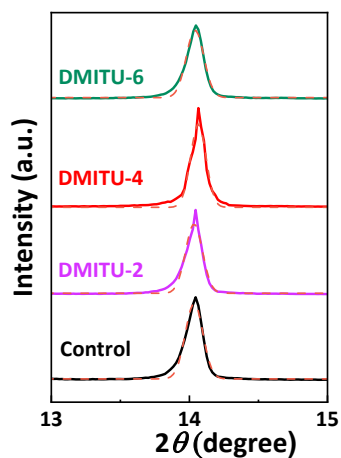

**Fig. S3** The magnified XRD patterns with Gaussian fit for the control and DMITU PSCs with different concentrations.

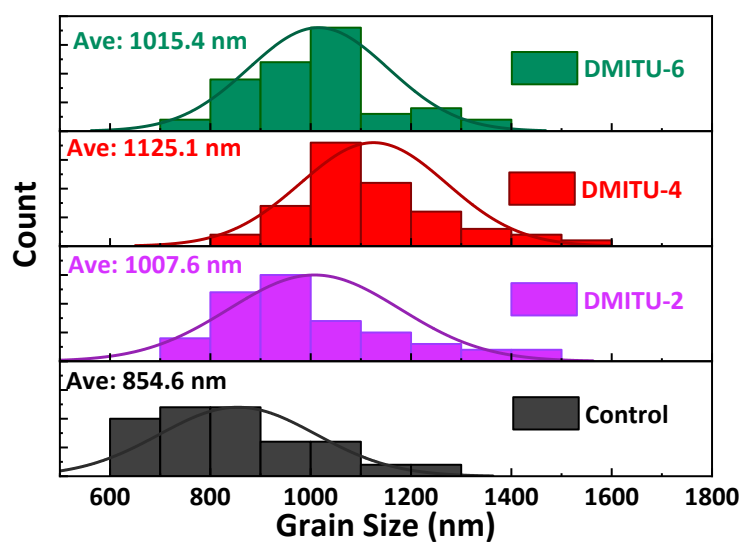

**Fig. S4** The statistic distributions of the grain sizes for the control, DMITU-2, DMITU-4 and DMITU-6 perovskite films.

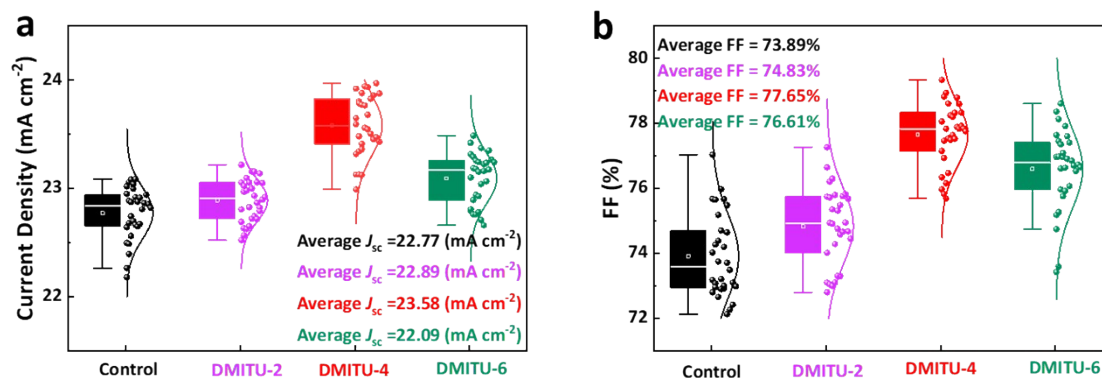

**Fig. S5** (a)  $J_{sc}$  and (b) FF distributions of the control, DMITU-2, DMITU-4 and DMITU-6 perovskite devices.

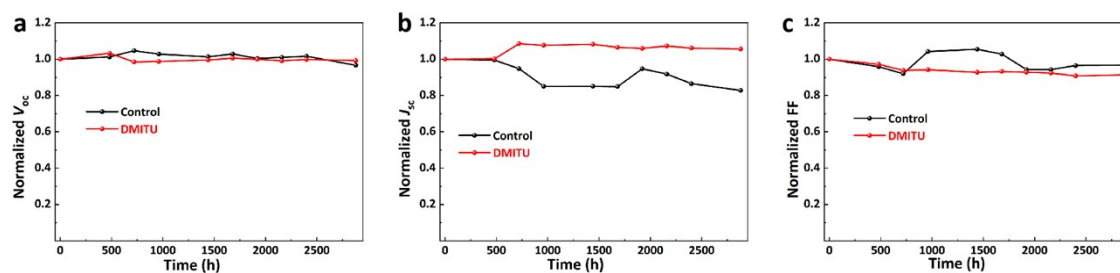

**Fig. S6** Normalized (a)  $V_{oc}$ , (b)  $J_{sc}$  and (c) FF variation curves of the unsealed control and DMITU PSCs aging under 50% RH for 2880 h.

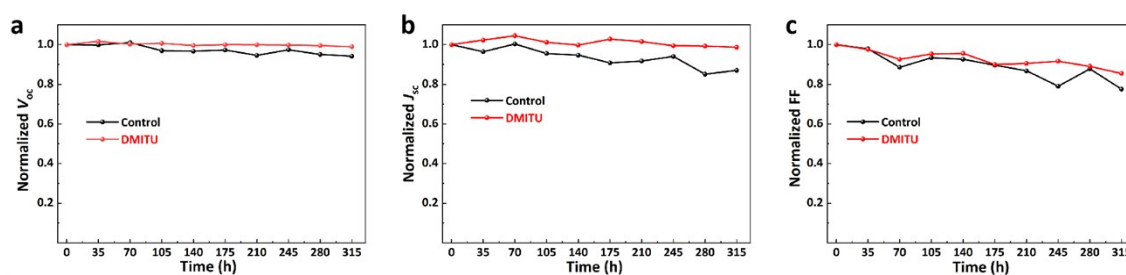

**Fig. S7** Normalized (a)  $V_{oc}$ , (b)  $J_{sc}$  and (c) FF variation curves of the unsealed control and DMITU PSCs aging at 85 °C for 315 h.

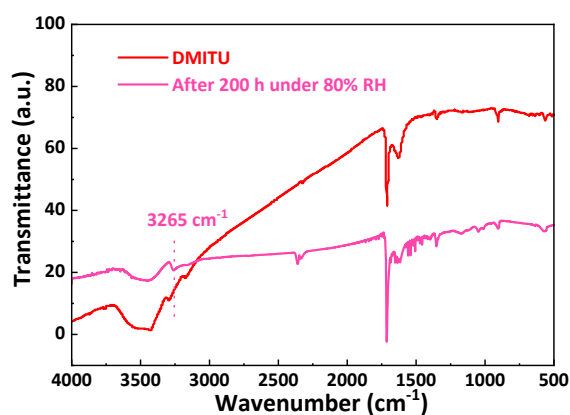

**Fig. S8** FTIR spectra of the perovskite + DMITU film before and after aging under 80% RH for 200 h.

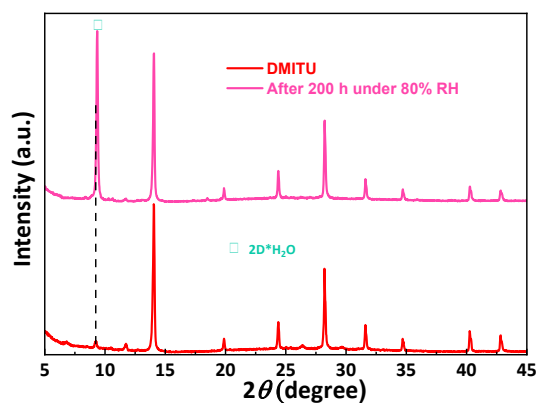

**Fig. S9** XRD patterns for the DMITU perovskite film before and after aging under about 80% RH for 200 h.

**Table S1** Photovoltaic parameters of the control and DMITU PSCs with different concentrations.

| Device  | $V_{oc}$ (V) | $J_{sc}$ (mA cm <sup>-2</sup> ) | FF (%) | PCE (%) |
|---------|--------------|---------------------------------|--------|---------|
| Control | 1.14         | 23.02                           | 77.05  | 20.18   |
| DMITU-2 | 1.17         | 23.06                           | 77.23  | 20.78   |
| DMITU-4 | 1.17         | 23.92                           | 79.34  | 22.26   |
| DMITU-6 | 1.17         | 23.42                           | 78.37  | 21.51   |
| DMITU-8 | 1.14         | 23.00                           | 73.47  | 19.21   |

**Table S2** Photovoltaic parameters of the control and DMITU PSCs under reverse and forward scan directions.

| Device          | $V_{oc}$ (V) | $J_{sc}$ (mA cm <sup>-2</sup> ) | FF (%) | PCE (%) |
|-----------------|--------------|---------------------------------|--------|---------|
| Control-Reverse | 1.14         | 23.02                           | 77.05  | 20.18   |
| Control-Forward | 1.12         | 23.05                           | 73.27  | 18.95   |
| DMITU-Reverse   | 1.17         | 23.92                           | 79.34  | 22.26   |
| DMITU-Forward   | 1.17         | 23.68                           | 78.90  | 21.86   |

**Table S3** The intensities and FWHM values of the (110) crystal plane for the control and DMITU PSCs with different concentrations.

| Device  | Intensity (a.u.) | FWHM    |
|---------|------------------|---------|
| Control | 19236            | 0.12733 |
| DMITU-2 | 20013            | 0.12304 |
| DMITU-4 | 22947            | 0.11202 |
| DMITU-6 | 17037            | 0.12788 |
